# Supplementary material for: Histological Profiling of the Human Umbilical Cord: A Potential Alternative Cell Source in Tissue Engineering
Source: MDPI journal article supplement (doi:10.3390/jpm12040648), 2022-04-18
Supplement: s1 [file s1]

**Table S1.** Antibodies and reagents used for the immunohistochemistry and immunofluorescence analysis.

| Antibody/Reagent                           | Dilution/Incubation            | Pretreatment                                                 | Reference                                                 |
|--------------------------------------------|--------------------------------|--------------------------------------------------------------|-----------------------------------------------------------|
| Rabbit Anti-CD31 (PECAM-1)                 | 1:500 Overnight at 4 °C        | Citrate buffer pH = 6 20 min at 95 °C                        | Abcam. Cambridge, UK. (ref. ab76533)                      |
| Rabbit Anti-CD34                           | 1:2500 Overnight at 4 °C       | Citrate buffer pH = 6 20 min at 95 °C                        | Abcam. Cambridge, UK. (ref. ab81289)                      |
| Rabbit Anti-CD73                           | 1:200 Overnight at 4 °C        | Citrate buffer pH = 6 20 min at 95 °C                        | Abcam. Cambridge, UK. (ref. ab175396)                     |
| Rabbit Anti-CD90                           | 1:25 Overnight at 4 °C         | Citrate buffer pH = 6 20 min at 95 °C                        | Abcam. Cambridge, UK. (ref. ab92574)                      |
| Rabbit Anti-CD105                          | 1:200 Overnight at 4 °C        | Citrate buffer pH = 6 20 min at 95 °C                        | Abcam. Cambridge, UK. (ref. ab169545)                     |
| Rabbit Anti-Collagen III                   | 1:250 Overnight at 4 °C        | Citrate buffer pH = 6 20 min at 95 °C                        | Abcam. Cambridge, UK. (ref. ab7778)                       |
| Mouse Anti-Collagen IV                     | Ready to use Overnight at 4 °C | EDTA buffer pH = 8 20 min at 95 °C<br>Pepsin 10 min at 37 °C | Master Diagnostica. Granada, Spain. MAD-000733QD          |
| Mouse Anti-Fibronectin                     | 1:250 Overnight at 4 °C        | EDTA buffer pH = 8 20 min at 95 °C                           | Invitrogen. Waltham, MA. (ref.11981)                      |
| Rabbit Anti-Versican                       | 1:100 Overnight at 4 °C        | Chondroitinase 60 min at 37 °C                               | Abcam. Cambridge, UK. (ref. ab19345)                      |
| Mouse Anti-Vimentin                        | 1:200 Overnight at 4 °C        | Citrate buffer pH = 6 20 min at 95 °C                        | Sigma-Aldrich/Merck. Steinheim, Germany. (Cat. no. V6389) |
| Rabbit Anti-Von Willebrand Factor (vWF)    | 1:200 Overnight at 4 °C        | Citrate buffer pH = 6 20 min at 95 °C                        | Abcam. Cambridge, UK. (ref. ab6994)                       |
| ImmPRESS® HRP Anti-Rabbit IgG (Peroxidase) | Ready to use 30 min at RT      | -                                                            | Vector Laboratories. Burlingame, CA. (ref. MP-7401)       |
| ImmPRESS® HRP Anti-Mouse IgG (Peroxidase)  | Ready to use 30 min at RT      | -                                                            | Vector Laboratories. Burlingame, CA. (ref. MP-7402)       |
| FITC-conjugated anti-mouse                 | 1:500 1 hour at RT             | -                                                            | Sigma-Aldrich/Merck. Steinheim, Germany. (Cat. no. F0257) |
| FITC-conjugated anti-rabbit                | 1:500 1 hour at RT             | -                                                            | Sigma-Aldrich/Merck. Steinheim, Germany. (Cat. no. F7367) |
